# Supplementary material for: Expression and estrogen regulation of G protein-coupled estrogen receptor in human glioblastoma cells
Source: PubMed Central journal article supplement — Oncol Lett. 2022 Sep 21;24(5):397. doi: 10.3892/ol.2022.13517 (PMC9533654; doi:10.3892/ol.2022.13517), 2022-09-21

Figure S1. GPER expression in various culture conditions. Representative GPER U87 cell western blots were obtained under various culture conditions. GPER immunoreactive bands at 70 and 55 kDa correspond to the following conditions: (A) DMEM with phenol red and SFB with the addition of hormones. (B) DMEM without phenol red and SFB without the addition of hormones. (C) DMEM without phenol red, SFB without the addition of hormones and E2 treatment. The band pattern was similar to the patterns of the four analyzed brain tumor cell lines. GPER, G-protein coupled estrogen receptor; SFB, fetal bovine serum; E2, 17  $\beta$ -estradiol.

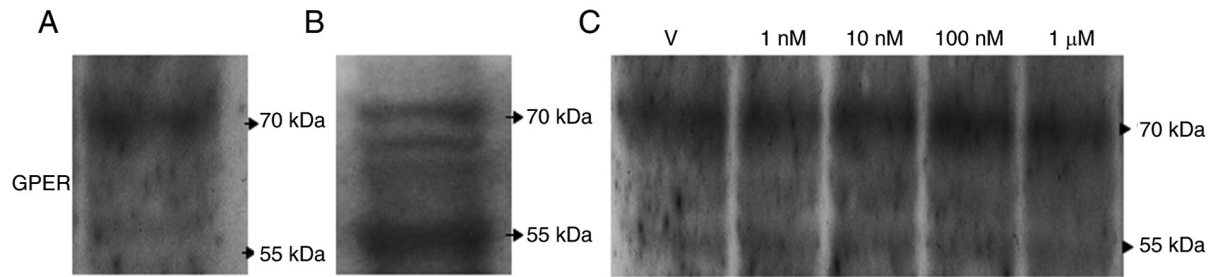

Supplement: Supplementary_Data.pdf [file Supplementary_Data.pdf]
